# Supplementary material for: Long Range PCR-based deep sequencing for haplotype determination in mixed HCMV infections
Source: Research Square preprint supplement (doi:10.21203/rs.3.rs-689610/v1), 2021-08-06
Supplement: Supplementary file 1 [file 6233bd6ae7f5867bc4cf42b7.xlsx]

## Sheet: Table 1
Table 1. Efficiency of long range PCR for the distinct fragments by the use of three commercially available enzymes.
Amplicon	Fragment length in bases	GC content in %	total BAC-DNA as template (100ng)			cell-culture derived DNA as template*
			TaK	Pro	Qia	TaK	TaK
			efficiency	efficiency	efficiency	specificity (1x105 copies/reaction)	sensitivity (copies/reaction)
F1.1	7807	56.5	high	low	low	low	300
F1.2	13807	58.9	high	-	-	-	nd
F1.3	18015	56.5	-	-	-	nd	nd
F2.1	8278	57.1	high	-	-	-	nd
F2.2	13348	58.8	high	-	-	-	nd
F2.3	17861	56.4	-	-	-	nd	nd
F3	7705	53.7	high	high	low	high	30
F4	6671	48.5	high	nd	nd	high	30
* two different HCMV strains (TB40E and Merlin); high and low efficiency as determined by the strength of visible bands of the correct length; high specificity as determined by the absence of unspecific bands; TaK: LA Taq Hot Start Version Polymerase; Qia: LongRange PCR Polymerase; Pro: Promega Go Taq Long; nd: not determined; "-": no visible band or smear.

## Sheet: Table 2
Table 2. Trimming, filtering, and mapping of PacBio-derived reads for error estimation.
pError	Template HCMV DNA	Input DNA	Reference length in kb	Number and average read length of sequencing reads
					raw reads	after qtrim	after hu removal	% of reads <500 bases	after ltrim	% HCMV mapping	map to reference	average coverage
0.01	Merlin	amplicons	15.5	number	92128	63604	30632	18.7	24909	98.26	24475	6885
				length	4656	2820	3741		4547
	TB40-BAC4-luc	amplicons	15.5	number	73439	46547	42060	19.1	34041	99.53	33881	9062
				length	6162	3590	3767		4601
	Merlin	non-enriched	237	number	143728	102444	5166	13.9	4447	85.29	3793	45
				length	4378	2722	2956		3397
	TB40-BAC4-luc	non-enriched	235	number	96966	72804	9122	12.6	7975	93.63	7467	73
				length	3583	2439	2417		2731
0.001	Merlin	amplicons	15.5	number	92128	50031	22247	36.4	14154	97.76	13837	2444
				length	4656	1631	1896		2843
	TB40-BAC4-luc	amplicons	15.5	number	73439	34137	30361	37.2	19070	99.26	18929	3118
				length	6162	1814	1865		2828
	Merlin	non-enriched	237	number	143728	83991	4028	27.2	2931	86.49	2535	25
				length	4378	1849	1934		2566
	TB40-BAC4-luc	non-enriched	235	number	96966	60539	7402	23.2	5688	94.57	5379	45
				length	3583	1727	1751		2205
kb, kilobases; qtrim, quality trim; hu, human DNA-specific reads; ltrim, length trim.

## Sheet: Table 3
Table 3. Error rates introduced by Long-range PCR and/or sequencing.
Sequencing platform	Quality trimming	Input DNA	Substitutions*	Deletions*	Insertions*	Substitutions per nucleotide*
						A	C	G	T
PacBio	pError 0.01	amplicons	0.083	0.06	0.289	0.115	0.054	0.061	0.111
		non-enriched	0.015	0.051	0.204	0.015	0.013	0.017	0.014
PacBio	pError 0.001	amplicons	0.081	0.018	0.077	0.110	0.052	0.062	0.108
		non-enriched	0.009	0.012	0.029	0.009	0.006	0.010	0.008
Illumina	pError 0.01	amplicons	0.163	0.005	0.002	0.242	0.096	0.089	0.240
		non-enriched	0.083	0.004	0.001	0.091	0.077	0.078	0.090
Illumina	pError 0.001	amplicons	0.120	0.004	0.001	0.182	0.071	0.067	0.171
		non-enriched	0.027	0.004	0.001	0.028	0.025	0.027	0.028
* Error rate is the percentage of mismatches of the total number of bases mapped to the reference sequence. Error rates are means of two distinct input DNAs (Merlin and TB-BAC4-luc, and two amplicons (F1.1+F3, respectively).

## Sheet: Table 4a
Table 4a. Ratio estimation of artificial mixtures used as template DNA for long range PCR.
Artificial Mixture	HCMV-DNA	Aspired input ratio	Measured copies/reaction1	Measured ratio1	Copy input for PCR	Measured ratio2
1	Merlin	50	3900000	57	39000	44
	TB40-BAC4-luc	50	2900000	43	29000	56
2	Merlin	95	8600000	94	86000	94
	TB40-BAC4-luc	5	470000	6	4700	6
3	Merlin	5	470000	11	4700	3
	TB40-BAC4-luc	95	3900000	89	39000	97
4	Merlin	99	12000000	99	120000	98
	TB40-BAC4-luc	1	130000	1	1300	2
5	Merlin	1	190000	5	1900	1
	TB40-BAC4-luc	99	3900000	95	39000	99
1) confirmed by HCMV-specific qPCR against gH; 2) measured ratios are means of reads mapping to genotypic regions within gN, gO, and gH; sequencing was done in duplicates.

## Sheet: Table 4b
Table 4b. Ratio estimation of dilution series of artificial mixtures.
Artificial Mixture	HCMV-DNA	Aspired Input ratio	estimated copies/reaction	Copy input for PCR	Measured ratio2
1	Merlin	1	1,90E+05 1	190000	1.5
	TB40-BAC4-luc	99	3,90E+06 1	39000	98.5
1:10	Merlin	1	19000	190	1
	TB40-BAC4-luc	99	390000	3900	99
1:100	Merlin	1	1900	19	1.5
	TB40-BAC4-luc	99	39000	390	98.5
1:1000	Merlin	1	190	1.9	0
	TB40-BAC4-luc	99	3900	39	100
1) original mixture was confirmed by HCMV-specific qPCR (see Table 4a); 2) measured ratios are means of reads mapping to genotypic regions within gN, gO, and gH.

## Sheet: Table 5
Table 5. Number and ratio of individual haplotype sequences with corresponding gN, gO, and UL146 genotypes.
Sample	Haplotypes determined by long amplicon PacBio sequencing				Genotypes2 assigned by short amplicon Illumina sequencing
	Target site	Seq ID	Reference sequence Acc.No. (% identity)1	Frequency of occurrence (%)	gN	gO	UL146
BAL2	F3	BAL2_F3_hap1	JX512202.1 (99.9)	58.7	3b	2a
		BAL2_F3_hap2	KP745677.1 (99.1)	35.1	3b	2a
		BAL2_F3_hap3	KJ361966.1 (99.3)	6.2	1	1a
	F4	BAL2_F4_hap1	KP745638.1 (99.9)	59.2			13
		BAL2_F4_hap2	KP745654.1 (98.6)	32.3			13
		BAL2_F4_hap3	KT726941.2 (98.3)	8.5			12
BAL4	F3	BAL4_F3_hap1	KR534203.1 (99.9)	100	1	1a
					3b	2a
	F4	BAL4_F4_hap1	KU550090.1 (99.9)	100			14
							13
BAL5	F3	BAL5_F3_hap1	KY490065.1 (99.9)	78.1	3b	2a
		BAL5_F3_hap2	JX512208.1 (99.9)	14.1	2	2b
		BAL5_F3_hap3	KY490066.1 (99.9)	7.8	3a	1b
	F4	BAL5_F4_hap1	KR534198.1 (99.8)	75.1			6
		BAL5_F4_hap2	KP745691.1 (99.8)	16.8			7
		BAL5_F4_hap3	JX512208.1 (99.9)	8.1			11
BAL6	F3	BAL6_F3_hap1	KR534203.1 (99.9)	100	1	1a
					3b	2a
	F4	BAL6_F4_hap1	KY490086.1 (99.9)	85.6			2
		BAL6_F4_hap2	KY490085.1 (97.1)	14.4			1
1) Sequence in GenBank database with highest similarity to haplotype sequence; 2) according to Suarez et al., 2019, doi: 10.1093/infdis/jiz208; BAL, bronchoalveolar lavage; Acc.No., Accession number.
